# Supplementary material
Source: MDPI journal article supplement (https://www.mdpi.com/2072-4292/10/12/1892)
Supplement: s1 [file s1]

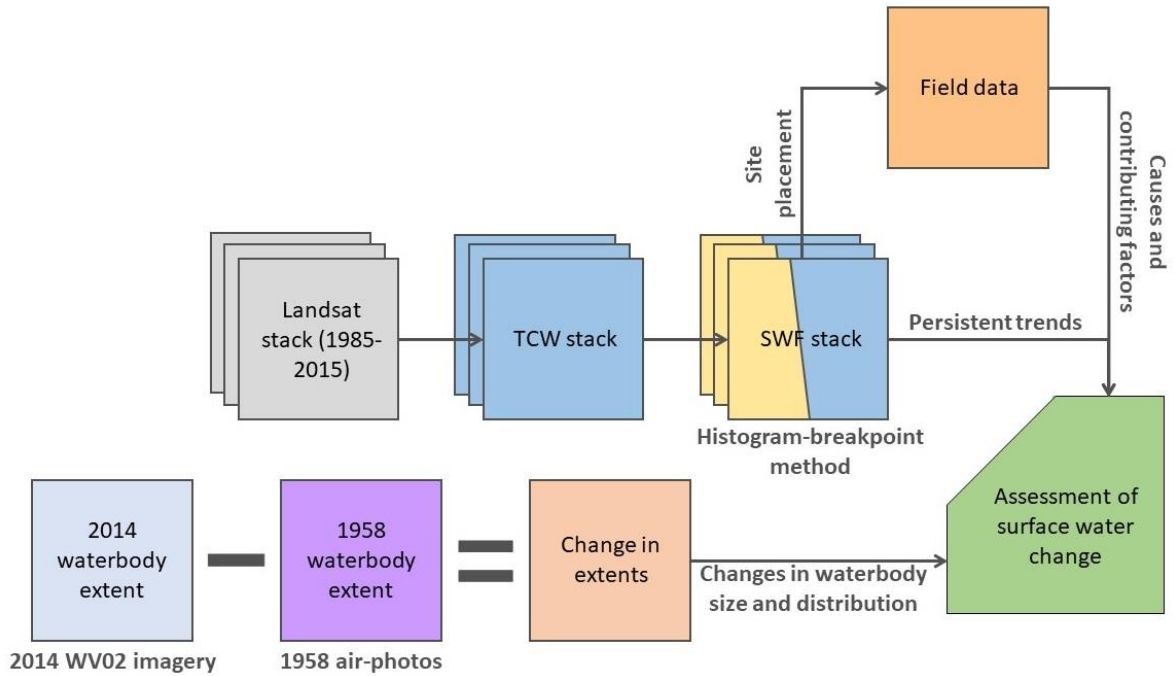

**Figure S1.** Flow chart outlining the various components of the study and the contributions of each data piece to the final assessment of surface water change.

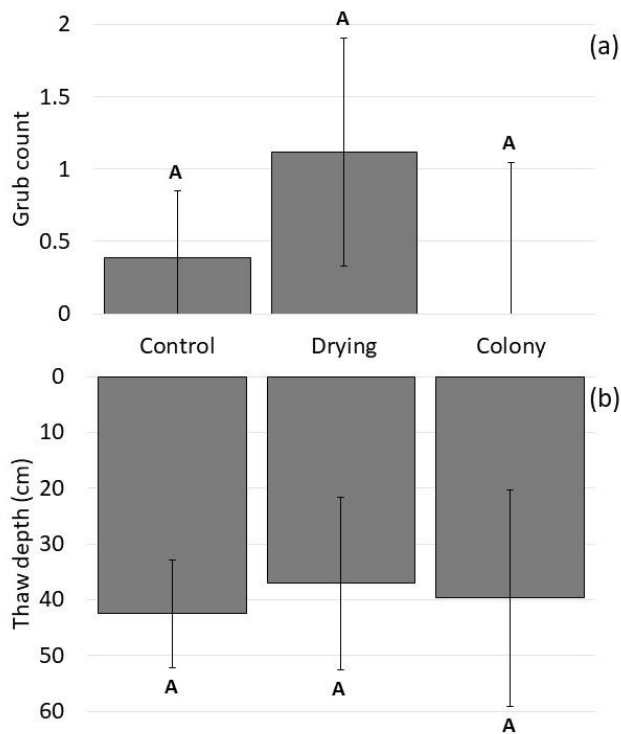

**Figure S2.** Least-squares means estimates of (a) snow goose grub counts and (b) thaw depth from the linear mixed effects models. Error bars represent 95% confidence intervals and bars with different letters are significantly different.
